# Supplementary material for: Mcl-1 regulates reactive oxygen species via NOX4 during chemotherapy-induced senescence
Source: PubMed Central journal article supplement (PMC5438639; doi:10.18632/oncotarget.15962), 2017-03-07
Supplement: oncotarget-08-28154-s001.pdf [file oncotarget-08-28154-s001.pdf]

# Mcl-1 regulates reactive oxygen species via NOX4 during chemotherapy-induced senescence

## Supplementary Materials

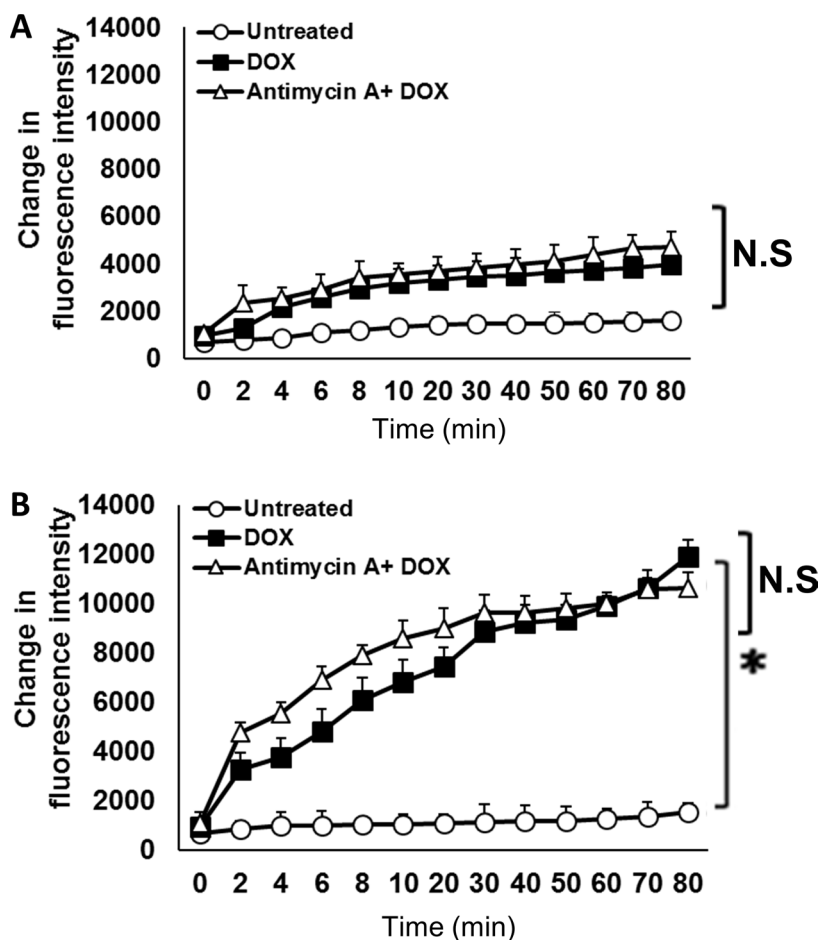

**Supplementary Figure 1: Antimycin A , a complex III blocker increased the ROS generation in response to chemotherapy.** HCT116 p53<sup>-/-</sup> shcontrol (A) or shMcl-1 (B) cells were treated in the presence or absence of Antimycin A and/or doxorubicin. After treatment, the ROS levels were assessed with Amplex Red at the indicated time points. N.S. indicates no statistical difference between doxorubicin-alone and doxorubicin plus antimycin A treatment groups at the final timepoint.

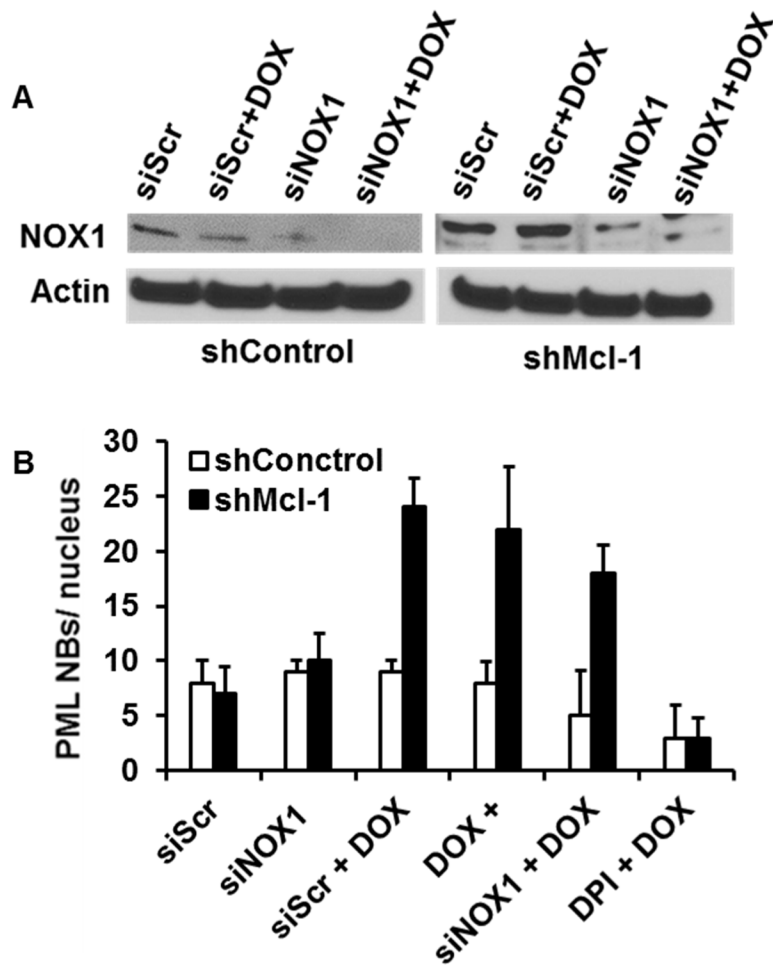

**Supplementary Figure 2: Knock-down of NOX1 did not affect senescence induction in sensitive (Mcl-1 deficient) cells.** HCT116 p53<sup>-/-</sup> shControl or shMcl-1 cells were transfected with scramble siRNA (siScr) as control or with NOX1 siRNA (siNOX1). After doxorubicin treatment, the level of NOX1 was quantified by western blotting (A). Cells transfected as in (A) were treated with or without doxorubicin or doxorubicin + DPI after which the level of PML nuclear body formation was quantified (B). Significant differences are compared with untreated control versus doxorubicin treated as well as untreated versus doxorubicin plus inhibitors. Quantitative data are inclusive of at least three independent experiments.
